# Supplementary material for: Patients’ Experiences of Accessing Their Electronic Health Records: National Patient Survey in Sweden
Source: PubMed Central journal article supplement (PMC6238103; doi:10.2196/jmir.9492), 2018-11-01
Supplement: jmir_v20i11e278_app1.pdf [file jmir_v20i11e278_app1.pdf]

## **Questionnaire - Patient empowerment Evaluation of the patient's online medical records**

The purpose of this survey is to identify and understand why patients choose to read their medical records online, how they experience the eHealth service and which other eHealth and information sources you would like to have access to in the future.

The survey provides a basis for the evaluation of e-health service “Journalen” and provide opportunities for you to influence the improvement of the eHealth service. Your feedback is important as it can help in developing better eHealth services in the future. The survey is part of research on eHealth performed by a group of researchers from Uppsala University, Örebro University, Lund University and the University of Skövde. The research is coordinated by Åsa Cajander (Uppsala University).

The results will be reported publicly, and be the basis for scientific articles.

We are happy to answer questions regarding the research and survey. For questions regarding the questionnaire study, contact

Rose-Mharie Åhlfeldt  
[rose-mharie.ahlfeldt@his.se](mailto:rose-mharie.ahlfeldt@his.se)  
0730 - 67 72 67

For questions about the research project, please contact project manager

Åsa Cajander  
[asa.cajander@it.uu.se](mailto:asa.cajander@it.uu.se)  
0704-425 07 86

All responses are anonymous and thus cannot be traced to the informant. The data will not be transferred to third parties or used for commercial purposes.

Your participation is completely voluntary and you can cancel at any time the survey

GENERAL QUESTIONS ON *Journalen***1. I received information about the possibility to use *Journalen* via:**

- Medical professionals
- Media
- Information on the care unit
- Friends / Relatives

Other (specify): \_\_\_\_\_

**2. How often do you use *Journalen*?**

- Several times a day
- Once a week
- Several times a week
- Once a month

**3. What is your attitude towards *Journalen*?**

|                                                                                                     | <i>Strongly Disagree</i> | <i>Disagree</i>          | <i>Neutral</i>           | <i>Agree</i>             | <i>Strongly Agree</i>    |
|-----------------------------------------------------------------------------------------------------|--------------------------|--------------------------|--------------------------|--------------------------|--------------------------|
| I believe that access to medical records online is generally a good reform                          | <input type="checkbox"/> | <input type="checkbox"/> | <input type="checkbox"/> | <input type="checkbox"/> | <input type="checkbox"/> |
| I believe that access to <i>Journalen</i> is good for me                                            | <input type="checkbox"/> | <input type="checkbox"/> | <input type="checkbox"/> | <input type="checkbox"/> | <input type="checkbox"/> |
| I would consider to change healthcare providers to get one that gives me access to <i>Journalen</i> | <input type="checkbox"/> | <input type="checkbox"/> | <input type="checkbox"/> | <input type="checkbox"/> | <input type="checkbox"/> |

**4. Why do you use *Journalen*?**

|                                                                   | <i>Strongly Disagree</i> | <i>Disagree</i>          | <i>Neutral</i>           | <i>Agree</i>             | <i>Strongly Agree</i>    |
|-------------------------------------------------------------------|--------------------------|--------------------------|--------------------------|--------------------------|--------------------------|
| Mostly general interest                                           | <input type="checkbox"/> | <input type="checkbox"/> | <input type="checkbox"/> | <input type="checkbox"/> | <input type="checkbox"/> |
| To get an overview of my medical history and treatment            | <input type="checkbox"/> | <input type="checkbox"/> | <input type="checkbox"/> | <input type="checkbox"/> | <input type="checkbox"/> |
| To get an overview of my relatives' medical history and treatment | <input type="checkbox"/> | <input type="checkbox"/> | <input type="checkbox"/> | <input type="checkbox"/> | <input type="checkbox"/> |
| Because I am not sure if I got the right care                     | <input type="checkbox"/> | <input type="checkbox"/> | <input type="checkbox"/> | <input type="checkbox"/> | <input type="checkbox"/> |
| To follow up what has been said during a healthcare visit         | <input type="checkbox"/> | <input type="checkbox"/> | <input type="checkbox"/> | <input type="checkbox"/> | <input type="checkbox"/> |
| Because I suspect inaccuracies                                    | <input type="checkbox"/> | <input type="checkbox"/> | <input type="checkbox"/> | <input type="checkbox"/> | <input type="checkbox"/> |
| To prepare for my healthcare visit                                | <input type="checkbox"/> | <input type="checkbox"/> | <input type="checkbox"/> | <input type="checkbox"/> | <input type="checkbox"/> |
| To become more involved in my care                                | <input type="checkbox"/> | <input type="checkbox"/> | <input type="checkbox"/> | <input type="checkbox"/> | <input type="checkbox"/> |

Other (specify): \_\_\_\_\_

**5. How important is it for you to be able to access patient information?**

|                                                                                                      | <i>Strongly Disagree</i> | <i>Disagree</i>          | <i>Neutral</i>           | <i>Agree</i>             | <i>Strongly Agree</i>    |
|------------------------------------------------------------------------------------------------------|--------------------------|--------------------------|--------------------------|--------------------------|--------------------------|
| It improves communication between medical staff and me                                               | <input type="checkbox"/> | <input type="checkbox"/> | <input type="checkbox"/> | <input type="checkbox"/> | <input type="checkbox"/> |
| It leads to improvements in health and social care                                                   | <input type="checkbox"/> | <input type="checkbox"/> | <input type="checkbox"/> | <input type="checkbox"/> | <input type="checkbox"/> |
| It improves the understanding of the condition                                                       | <input type="checkbox"/> | <input type="checkbox"/> | <input type="checkbox"/> | <input type="checkbox"/> | <input type="checkbox"/> |
| It makes me feel safe                                                                                | <input type="checkbox"/> | <input type="checkbox"/> | <input type="checkbox"/> | <input type="checkbox"/> | <input type="checkbox"/> |
| It makes me feel informed                                                                            | <input type="checkbox"/> | <input type="checkbox"/> | <input type="checkbox"/> | <input type="checkbox"/> | <input type="checkbox"/> |
| It leads to that I can take care of my health better                                                 | <input type="checkbox"/> | <input type="checkbox"/> | <input type="checkbox"/> | <input type="checkbox"/> | <input type="checkbox"/> |
| It leads to that I can take care of my relatives' health better                                      | <input type="checkbox"/> | <input type="checkbox"/> | <input type="checkbox"/> | <input type="checkbox"/> | <input type="checkbox"/> |
| It is essential that I am able to actively participate in decisions about my or my relatives' health | <input type="checkbox"/> | <input type="checkbox"/> | <input type="checkbox"/> | <input type="checkbox"/> | <input type="checkbox"/> |
| For my own documentation                                                                             | <input type="checkbox"/> | <input type="checkbox"/> | <input type="checkbox"/> | <input type="checkbox"/> | <input type="checkbox"/> |
| It has no relevance                                                                                  | <input type="checkbox"/> | <input type="checkbox"/> | <input type="checkbox"/> | <input type="checkbox"/> | <input type="checkbox"/> |

Other (specify): \_\_\_\_\_

**6. How long do you think is reasonable to have to wait after a healthcare visit before you have access to your medical records via *Journalen*?**

- Same day (unsigned / uncertified information)
- After a day (unsigned / uncertified information)
- Two weeks (can be both signed / certified and unsigned / uncertified data)
- One month (can be both signed / certified and unsigned / uncertified data)

Other (specify): \_\_\_\_\_

**7. To what extent do you agree with the following statements regarding your relationship with healthcare?**

|                                                                                                                              | <i>Strongly Disagree</i> | <i>Disagree</i>          | <i>Neutral</i>           | <i>Agree</i>             | <i>Strongly Agree</i>    |
|------------------------------------------------------------------------------------------------------------------------------|--------------------------|--------------------------|--------------------------|--------------------------|--------------------------|
| To take part of the patient information via <i>Journalen</i> has affected the relationship with healthcare system positively | <input type="checkbox"/> | <input type="checkbox"/> | <input type="checkbox"/> | <input type="checkbox"/> | <input type="checkbox"/> |
| Medical staff has informed me about the possibility to read <i>Journalen</i>                                                 | <input type="checkbox"/> | <input type="checkbox"/> | <input type="checkbox"/> | <input type="checkbox"/> | <input type="checkbox"/> |
| Medical staff has encouraged me to use <i>Journalen</i>                                                                      | <input type="checkbox"/> | <input type="checkbox"/> | <input type="checkbox"/> | <input type="checkbox"/> | <input type="checkbox"/> |
| I discuss the content of <i>Journalen</i> with medical staff                                                                 | <input type="checkbox"/> | <input type="checkbox"/> | <input type="checkbox"/> | <input type="checkbox"/> | <input type="checkbox"/> |

**8. What do you think about the usability of *Journalen*?**

|                                                                               | <i>Strongly Disagree</i> | <i>Disagree</i>          | <i>Neutral</i>           | <i>Agree</i>             | <i>Strongly Agree</i>    |
|-------------------------------------------------------------------------------|--------------------------|--------------------------|--------------------------|--------------------------|--------------------------|
| I think I want to use <i>Journalen</i> regularly                              | <input type="checkbox"/> | <input type="checkbox"/> | <input type="checkbox"/> | <input type="checkbox"/> | <input type="checkbox"/> |
| I think that <i>Journalen</i> is more complicated than it needs to be         | <input type="checkbox"/> | <input type="checkbox"/> | <input type="checkbox"/> | <input type="checkbox"/> | <input type="checkbox"/> |
| I think that <i>Journalen</i> is easy to use                                  | <input type="checkbox"/> | <input type="checkbox"/> | <input type="checkbox"/> | <input type="checkbox"/> | <input type="checkbox"/> |
| I think I would need personal technical support to use <i>Journalen</i>       | <input type="checkbox"/> | <input type="checkbox"/> | <input type="checkbox"/> | <input type="checkbox"/> | <input type="checkbox"/> |
| I think that the various functions in <i>Journalen</i> work well together     | <input type="checkbox"/> | <input type="checkbox"/> | <input type="checkbox"/> | <input type="checkbox"/> | <input type="checkbox"/> |
| I think there are many elements in <i>Journalen</i> that are not consistent   | <input type="checkbox"/> | <input type="checkbox"/> | <input type="checkbox"/> | <input type="checkbox"/> | <input type="checkbox"/> |
| I think that most people could learn to use <i>Journalen</i> fairly quickly   | <input type="checkbox"/> | <input type="checkbox"/> | <input type="checkbox"/> | <input type="checkbox"/> | <input type="checkbox"/> |
| I think that <i>Journalen</i> is difficult to use                             | <input type="checkbox"/> | <input type="checkbox"/> | <input type="checkbox"/> | <input type="checkbox"/> | <input type="checkbox"/> |
| I feel very safe and secure (about what I do) when I use <i>Journalen</i>     | <input type="checkbox"/> | <input type="checkbox"/> | <input type="checkbox"/> | <input type="checkbox"/> | <input type="checkbox"/> |
| I need to learn quite a lot before I can start using <i>Journalen</i>         | <input type="checkbox"/> | <input type="checkbox"/> | <input type="checkbox"/> | <input type="checkbox"/> | <input type="checkbox"/> |
| I as a user of 1177.se find it difficult to find the link to <i>Journalen</i> | <input type="checkbox"/> | <input type="checkbox"/> | <input type="checkbox"/> | <input type="checkbox"/> | <input type="checkbox"/> |

Other (specify): \_\_\_\_\_

**INFORMATION CONTENT****9. How accurate are the following statements regarding your understanding of the content in *Journalen*?**

|                                                                        | <i>Strongly Disagree</i> | <i>Disagree</i>          | <i>Neutral</i>           | <i>Agree</i>             | <i>Strongly Agree</i>    |
|------------------------------------------------------------------------|--------------------------|--------------------------|--------------------------|--------------------------|--------------------------|
| I understand most of what is in the medical records                    | <input type="checkbox"/> | <input type="checkbox"/> | <input type="checkbox"/> | <input type="checkbox"/> | <input type="checkbox"/> |
| I think that the medical records contain too much technical language   | <input type="checkbox"/> | <input type="checkbox"/> | <input type="checkbox"/> | <input type="checkbox"/> | <input type="checkbox"/> |
| I think that the medical records should be written more comprehensible | <input type="checkbox"/> | <input type="checkbox"/> | <input type="checkbox"/> | <input type="checkbox"/> | <input type="checkbox"/> |
| I understand most of the test results                                  | <input type="checkbox"/> | <input type="checkbox"/> | <input type="checkbox"/> | <input type="checkbox"/> | <input type="checkbox"/> |
| I understand most of the log list                                      | <input type="checkbox"/> | <input type="checkbox"/> | <input type="checkbox"/> | <input type="checkbox"/> | <input type="checkbox"/> |
| I understand most of the referral function                             | <input type="checkbox"/> | <input type="checkbox"/> | <input type="checkbox"/> | <input type="checkbox"/> | <input type="checkbox"/> |

**10. What would you do if you see something in *Journalen* you do not understand?**

|                                                                            | <i>Strongly Disagree</i> | <i>Disagree</i>          | <i>Neutral</i>           | <i>Agree</i>             | <i>Strongly Agree</i>    |
|----------------------------------------------------------------------------|--------------------------|--------------------------|--------------------------|--------------------------|--------------------------|
| Contact the current healthcare unit via phone                              | <input type="checkbox"/> | <input type="checkbox"/> | <input type="checkbox"/> | <input type="checkbox"/> | <input type="checkbox"/> |
| Ask medical staff at the next visit                                        | <input type="checkbox"/> | <input type="checkbox"/> | <input type="checkbox"/> | <input type="checkbox"/> | <input type="checkbox"/> |
| Ask a medically trained person, e.g. via phone on 1177                     | <input type="checkbox"/> | <input type="checkbox"/> | <input type="checkbox"/> | <input type="checkbox"/> | <input type="checkbox"/> |
| Ask an anonymous question via <a href="http://www.1177.se">www.1177.se</a> | <input type="checkbox"/> | <input type="checkbox"/> | <input type="checkbox"/> | <input type="checkbox"/> | <input type="checkbox"/> |
| Ask someone who I know personally, in family or among acquaintances        | <input type="checkbox"/> | <input type="checkbox"/> | <input type="checkbox"/> | <input type="checkbox"/> | <input type="checkbox"/> |
| Look for information myself, e.g. via Internet                             | <input type="checkbox"/> | <input type="checkbox"/> | <input type="checkbox"/> | <input type="checkbox"/> | <input type="checkbox"/> |
| Use social media, e.g. discussion forums                                   | <input type="checkbox"/> | <input type="checkbox"/> | <input type="checkbox"/> | <input type="checkbox"/> | <input type="checkbox"/> |
| Do nothing                                                                 | <input type="checkbox"/> | <input type="checkbox"/> | <input type="checkbox"/> | <input type="checkbox"/> | <input type="checkbox"/> |
| Other (specify): _____                                                     |                          |                          |                          |                          |                          |

**11. How do you share information in *Journalen* with others?**

|                                                                                               | <i>Strongly Disagree</i> | <i>Disagree</i>          | <i>Neutral</i>           | <i>Agree</i>             | <i>Strongly Agree</i>    |
|-----------------------------------------------------------------------------------------------|--------------------------|--------------------------|--------------------------|--------------------------|--------------------------|
| I use the Share-function in <i>Journalen</i> to appoint representatives and share information | <input type="checkbox"/> | <input type="checkbox"/> | <input type="checkbox"/> | <input type="checkbox"/> | <input type="checkbox"/> |
| Discuss it with relative                                                                      | <input type="checkbox"/> | <input type="checkbox"/> | <input type="checkbox"/> | <input type="checkbox"/> | <input type="checkbox"/> |
| Discuss it with medical staff                                                                 | <input type="checkbox"/> | <input type="checkbox"/> | <input type="checkbox"/> | <input type="checkbox"/> | <input type="checkbox"/> |
| Other (specify): _____                                                                        |                          |                          |                          |                          |                          |

**If you use the Share-function in *Journalen*, how do you share information?**

- I share all information in *Journalen*
- I share only selected parts in *Journalen*

**12. Have you read anything in *Journalen* that made you feel anxious?**

- Yes
- No

**If yes, what did you do?**

- Contacted healthcare via phone
- Waited until the next visit
- Contacted a friend with medical background
- Contacted patient association / patient committee
- Tried to find information about it on the Internet
- Done nothing

Other (specify): \_\_\_\_\_

**13. Have you read anything in *Journalen* that has made you feel upset?**

Yes   
 No

If you like, specify why you felt upset: \_\_\_\_\_

**If yes, what did you do?**

- Contacted healthcare via phone
- Waited until the next visit
- Contacted a friend who works in healthcare
- Contacted patient association / patient committee
- Wrote about it on social media
- Done nothing

Other (specify): \_\_\_\_\_

**14. Have you read anything in *Journalen* that was wrong, such as wrong information and/or data?**

Yes   
 No   
 Do not know

**If yes, what did you do?**

- Contacted healthcare via phone
- Waited until the next visit
- Contacted a friend with medical background
- Contacted patient association / patient committee
- Tried to find information about it on the Internet
- Done nothing

Other (specify): \_\_\_\_\_

**15. How accurate is the content of *Journalen*?**

|                                                                                                                          | <i>Strongly Disagree</i> | <i>Disagree</i>          | <i>Neutral</i>           | <i>Agree</i>             | <i>Strongly Agree</i>    |
|--------------------------------------------------------------------------------------------------------------------------|--------------------------|--------------------------|--------------------------|--------------------------|--------------------------|
| The content in the record reflects the information I think that healthcare has about me                                  | <input type="checkbox"/> | <input type="checkbox"/> | <input type="checkbox"/> | <input type="checkbox"/> | <input type="checkbox"/> |
| There is information about me that is missing in the record which I think should be there and that the staff should know | <input type="checkbox"/> | <input type="checkbox"/> | <input type="checkbox"/> | <input type="checkbox"/> | <input type="checkbox"/> |

If you consider that there is information missing that should be there, specify what type of information is missing: \_\_\_\_\_

**16. How important is *Journalen* to make you feel that you are involved in your own care?**

Multimedia Appendix 1: Questionnaire

|                                                                                                                                                    | <i>Strongly Disagree</i> | <i>Disagree</i>          | <i>Neutral</i>           | <i>Agree</i>             | <i>Strongly Agree</i>    |
|----------------------------------------------------------------------------------------------------------------------------------------------------|--------------------------|--------------------------|--------------------------|--------------------------|--------------------------|
| Information in <i>Journalen</i> has helped me in communication with medical staff                                                                  | <input type="checkbox"/> | <input type="checkbox"/> | <input type="checkbox"/> | <input type="checkbox"/> | <input type="checkbox"/> |
| Information in <i>Journalen</i> had a positive impact on the ability to work together with medical staff making decisions about care and treatment | <input type="checkbox"/> | <input type="checkbox"/> | <input type="checkbox"/> | <input type="checkbox"/> | <input type="checkbox"/> |
| Information in <i>Journalen</i> had a positive impact on the ability to follow the prescription of treatment                                       | <input type="checkbox"/> | <input type="checkbox"/> | <input type="checkbox"/> | <input type="checkbox"/> | <input type="checkbox"/> |
| Information in <i>Journalen</i> had a positive impact on the ability to take own steps to improve health                                           | <input type="checkbox"/> | <input type="checkbox"/> | <input type="checkbox"/> | <input type="checkbox"/> | <input type="checkbox"/> |

Other (specify): \_\_\_\_\_

**17. How important is it for you to have access to the following information which is wholly or partly based on information contained in *Journalen*?**

|                                                                                            | <i>Strongly Disagree</i> | <i>Disagree</i>          | <i>Neutral</i>           | <i>Agree</i>             | <i>Strongly Agree</i>    |
|--------------------------------------------------------------------------------------------|--------------------------|--------------------------|--------------------------|--------------------------|--------------------------|
| Referral (content and how it is handled in care)                                           | <input type="checkbox"/> | <input type="checkbox"/> | <input type="checkbox"/> | <input type="checkbox"/> | <input type="checkbox"/> |
| List of all pharmaceuticals                                                                | <input type="checkbox"/> | <input type="checkbox"/> | <input type="checkbox"/> | <input type="checkbox"/> | <input type="checkbox"/> |
| Overview of all vaccinations                                                               | <input type="checkbox"/> | <input type="checkbox"/> | <input type="checkbox"/> | <input type="checkbox"/> | <input type="checkbox"/> |
| Results of tests                                                                           | <input type="checkbox"/> | <input type="checkbox"/> | <input type="checkbox"/> | <input type="checkbox"/> | <input type="checkbox"/> |
| Overview of all healthcare contacts                                                        | <input type="checkbox"/> | <input type="checkbox"/> | <input type="checkbox"/> | <input type="checkbox"/> | <input type="checkbox"/> |
| Being able to read record entries from psychiatry                                          | <input type="checkbox"/> | <input type="checkbox"/> | <input type="checkbox"/> | <input type="checkbox"/> | <input type="checkbox"/> |
| Being able to read all types of record entries                                             | <input type="checkbox"/> | <input type="checkbox"/> | <input type="checkbox"/> | <input type="checkbox"/> | <input type="checkbox"/> |
| Ability to order and manage medical certificate and other certificates                     | <input type="checkbox"/> | <input type="checkbox"/> | <input type="checkbox"/> | <input type="checkbox"/> | <input type="checkbox"/> |
| Ability to point out errors I find in the record                                           | <input type="checkbox"/> | <input type="checkbox"/> | <input type="checkbox"/> | <input type="checkbox"/> | <input type="checkbox"/> |
| Ability to write own comments to text in <i>Journalen</i>                                  | <input type="checkbox"/> | <input type="checkbox"/> | <input type="checkbox"/> | <input type="checkbox"/> | <input type="checkbox"/> |
| Contribute with information on health, e.g. by providing Health declaration for next visit | <input type="checkbox"/> | <input type="checkbox"/> | <input type="checkbox"/> | <input type="checkbox"/> | <input type="checkbox"/> |
| Contribute with information of self-testing or monitoring at home                          | <input type="checkbox"/> | <input type="checkbox"/> | <input type="checkbox"/> | <input type="checkbox"/> | <input type="checkbox"/> |
| Contribute information about expectations for the healthcare visit                         | <input type="checkbox"/> | <input type="checkbox"/> | <input type="checkbox"/> | <input type="checkbox"/> | <input type="checkbox"/> |
| Ability to contact healthcare electronically and ask questions about medical record        | <input type="checkbox"/> | <input type="checkbox"/> | <input type="checkbox"/> | <input type="checkbox"/> | <input type="checkbox"/> |
| Ability to communicate electronically with other patients                                  | <input type="checkbox"/> | <input type="checkbox"/> | <input type="checkbox"/> | <input type="checkbox"/> | <input type="checkbox"/> |
| Ability to block certain medical records from access by other medical staff                | <input type="checkbox"/> | <input type="checkbox"/> | <input type="checkbox"/> | <input type="checkbox"/> | <input type="checkbox"/> |
| See which care units and staff groups have been inside <i>Journalen</i> (see log data)     | <input type="checkbox"/> | <input type="checkbox"/> | <input type="checkbox"/> | <input type="checkbox"/> | <input type="checkbox"/> |
| Ability to access information and manage services for my children                          | <input type="checkbox"/> | <input type="checkbox"/> | <input type="checkbox"/> | <input type="checkbox"/> | <input type="checkbox"/> |

Other (specify): \_\_\_\_\_

**SECURITY**

**18. How do you perceive the level of security in *Journalen*?**

|                                                                                                         | <i>Strongly Disagree</i> | <i>Disagree</i>          | <i>Neutral</i>           | <i>Agree</i>             | <i>Strongly Agree</i>    |
|---------------------------------------------------------------------------------------------------------|--------------------------|--------------------------|--------------------------|--------------------------|--------------------------|
| As far as I can judge, I think that <i>Journalen</i> generally maintains a high level of security.      | <input type="checkbox"/> | <input type="checkbox"/> | <input type="checkbox"/> | <input type="checkbox"/> | <input type="checkbox"/> |
| I trust that only authorized medical staff is accessing my medical records in <i>Journalen</i> .        | <input type="checkbox"/> | <input type="checkbox"/> | <input type="checkbox"/> | <input type="checkbox"/> | <input type="checkbox"/> |
| It is good that I as a patient am able to take part in the log list and see who has accessed my patient | <input type="checkbox"/> | <input type="checkbox"/> | <input type="checkbox"/> | <input type="checkbox"/> | <input type="checkbox"/> |

Other (specify): \_\_\_\_\_

**GENERAL QUESTIONS ON INFORMATION**

**19. How do you receive bad news about your health from your healthcare provider?**

- By Phone
- In connection with a healthcare visit
- Via mail
- Via other “web / eServices”

Other (specify): \_\_\_\_\_

**20. How would you want to receive bad news about your health?**

- By Phone
- In connection with a healthcare visit
- Via mail
- In connection with that I read alone about it in *Journalen*

Other (specify): \_\_\_\_\_

**21. How accurate are the following statements regarding access to health information?**

|                                                                                                                       | <i>Strongly<br/>Disagree</i> | <i>Disagree</i>          | <i>Neutral</i>           | <i>Agree</i>             | <i>Strongly<br/>Agree</i> |
|-----------------------------------------------------------------------------------------------------------------------|------------------------------|--------------------------|--------------------------|--------------------------|---------------------------|
| It is important (for me) to get information about health                                                              | <input type="checkbox"/>     | <input type="checkbox"/> | <input type="checkbox"/> | <input type="checkbox"/> | <input type="checkbox"/>  |
| I want to get health information from many different sources                                                          | <input type="checkbox"/>     | <input type="checkbox"/> | <input type="checkbox"/> | <input type="checkbox"/> | <input type="checkbox"/>  |
| I compare the health information I have received from various sources                                                 | <input type="checkbox"/>     | <input type="checkbox"/> | <input type="checkbox"/> | <input type="checkbox"/> | <input type="checkbox"/>  |
| It is easy to determine in what situations I need health information                                                  | <input type="checkbox"/>     | <input type="checkbox"/> | <input type="checkbox"/> | <input type="checkbox"/> | <input type="checkbox"/>  |
| I know where I can get health information                                                                             | <input type="checkbox"/>     | <input type="checkbox"/> | <input type="checkbox"/> | <input type="checkbox"/> | <input type="checkbox"/>  |
| I can use the health information I have received or acquired in order to take care of my own or other people's health | <input type="checkbox"/>     | <input type="checkbox"/> | <input type="checkbox"/> | <input type="checkbox"/> | <input type="checkbox"/>  |
| I easily get hold of the health information I need                                                                    |                              |                          |                          |                          |                           |
| a) in printed sources (magazines, books)                                                                              | <input type="checkbox"/>     | <input type="checkbox"/> | <input type="checkbox"/> | <input type="checkbox"/> | <input type="checkbox"/>  |
| b) on the internet                                                                                                    | <input type="checkbox"/>     | <input type="checkbox"/> | <input type="checkbox"/> | <input type="checkbox"/> | <input type="checkbox"/>  |
| c) on TV or radio                                                                                                     | <input type="checkbox"/>     | <input type="checkbox"/> | <input type="checkbox"/> | <input type="checkbox"/> | <input type="checkbox"/>  |
| d) from medical staff (e.g. doctors, nurses)                                                                          | <input type="checkbox"/>     | <input type="checkbox"/> | <input type="checkbox"/> | <input type="checkbox"/> | <input type="checkbox"/>  |
| e) from other people                                                                                                  | <input type="checkbox"/>     | <input type="checkbox"/> | <input type="checkbox"/> | <input type="checkbox"/> | <input type="checkbox"/>  |
| f) from healthcare information system etc.                                                                            | <input type="checkbox"/>     | <input type="checkbox"/> | <input type="checkbox"/> | <input type="checkbox"/> | <input type="checkbox"/>  |
| It is difficult to know whom to trust regarding health issues / questions                                             | <input type="checkbox"/>     | <input type="checkbox"/> | <input type="checkbox"/> | <input type="checkbox"/> | <input type="checkbox"/>  |
| It is easy to determine whether the health information I received from the following sources are reliable or not:     |                              |                          |                          |                          |                           |
| a) in printed sources (magazines, books)                                                                              | <input type="checkbox"/>     | <input type="checkbox"/> | <input type="checkbox"/> | <input type="checkbox"/> | <input type="checkbox"/>  |
| b) on the internet                                                                                                    | <input type="checkbox"/>     | <input type="checkbox"/> | <input type="checkbox"/> | <input type="checkbox"/> | <input type="checkbox"/>  |
| c) on TV or radio                                                                                                     | <input type="checkbox"/>     | <input type="checkbox"/> | <input type="checkbox"/> | <input type="checkbox"/> | <input type="checkbox"/>  |
| d) from medical staff (e.g., doctors, nurses)                                                                         | <input type="checkbox"/>     | <input type="checkbox"/> | <input type="checkbox"/> | <input type="checkbox"/> | <input type="checkbox"/>  |
| e) from other people                                                                                                  | <input type="checkbox"/>     | <input type="checkbox"/> | <input type="checkbox"/> | <input type="checkbox"/> | <input type="checkbox"/>  |
| It is difficult to understand words or sentences used in health information                                           | <input type="checkbox"/>     | <input type="checkbox"/> | <input type="checkbox"/> | <input type="checkbox"/> | <input type="checkbox"/>  |
| It is easy to understand the drugs package inserts, labels, or prescription                                           | <input type="checkbox"/>     | <input type="checkbox"/> | <input type="checkbox"/> | <input type="checkbox"/> | <input type="checkbox"/>  |
| I get way too much information about health                                                                           | <input type="checkbox"/>     | <input type="checkbox"/> | <input type="checkbox"/> | <input type="checkbox"/> | <input type="checkbox"/>  |
| I do not want to think about matters related to health                                                                | <input type="checkbox"/>     | <input type="checkbox"/> | <input type="checkbox"/> | <input type="checkbox"/> | <input type="checkbox"/>  |
|                                                                                                                       | <i>Strongly<br/>Disagree</i> | <i>Disagree</i>          | <i>Neutral</i>           | <i>Agree</i>             | <i>Strongly<br/>Agree</i> |
| I have avoided to read, listen to or watch health information                                                         |                              |                          |                          |                          |                           |
| a) in printed sources (magazines, books)                                                                              | <input type="checkbox"/>     | <input type="checkbox"/> | <input type="checkbox"/> | <input type="checkbox"/> | <input type="checkbox"/>  |

Multimedia Appendix 1: Questionnaire

- |                                              |                          |                          |                          |                          |                          |
|----------------------------------------------|--------------------------|--------------------------|--------------------------|--------------------------|--------------------------|
| b) on the internet                           | <input type="checkbox"/> | <input type="checkbox"/> | <input type="checkbox"/> | <input type="checkbox"/> | <input type="checkbox"/> |
| c) on TV or radio                            | <input type="checkbox"/> | <input type="checkbox"/> | <input type="checkbox"/> | <input type="checkbox"/> | <input type="checkbox"/> |
| d) from medical staff (e.g. doctors, nurses) | <input type="checkbox"/> | <input type="checkbox"/> | <input type="checkbox"/> | <input type="checkbox"/> | <input type="checkbox"/> |
| e) from other people                         | <input type="checkbox"/> | <input type="checkbox"/> | <input type="checkbox"/> | <input type="checkbox"/> | <input type="checkbox"/> |

The health information I receive

- |                                                        |                          |                          |                          |                          |                          |
|--------------------------------------------------------|--------------------------|--------------------------|--------------------------|--------------------------|--------------------------|
| a) helps me often to understand or learn something new | <input type="checkbox"/> | <input type="checkbox"/> | <input type="checkbox"/> | <input type="checkbox"/> | <input type="checkbox"/> |
| b) often confirms my previous understanding            | <input type="checkbox"/> | <input type="checkbox"/> | <input type="checkbox"/> | <input type="checkbox"/> | <input type="checkbox"/> |
| c) often conflict with my previous views               | <input type="checkbox"/> | <input type="checkbox"/> | <input type="checkbox"/> | <input type="checkbox"/> | <input type="checkbox"/> |
| I can affect my own health                             | <input type="checkbox"/> | <input type="checkbox"/> | <input type="checkbox"/> | <input type="checkbox"/> | <input type="checkbox"/> |

**22. What other sources do you use to find health information?**

- |                                                          |                          |
|----------------------------------------------------------|--------------------------|
| <a href="http://www.1177.se">www.1177.se</a>             | <input type="checkbox"/> |
| Internetmedicin.se                                       | <input type="checkbox"/> |
| Netdoktor.se                                             | <input type="checkbox"/> |
| Health magazines                                         | <input type="checkbox"/> |
| Books                                                    | <input type="checkbox"/> |
| Peer-to-peer sources (e.g., discussion forums, Facebook) | <input type="checkbox"/> |

Other (specify): \_\_\_\_\_

QUESTIONS ABOUT YOUR HEALTH

**23. I am part of one of the following disease groupings:**

- |                     |                          |
|---------------------|--------------------------|
| Cancer              | <input type="checkbox"/> |
| Mental health       | <input type="checkbox"/> |
| Diabetic            | <input type="checkbox"/> |
| High blood pressure | <input type="checkbox"/> |

Other (specify): \_\_\_\_\_

**24. I consider myself**

|                                   | <i>Strongly<br/>Disagree</i> | <i>Disagree</i>          | <i>Neutral</i>           | <i>Agree</i>             | <i>Strongly<br/>Agree</i> |
|-----------------------------------|------------------------------|--------------------------|--------------------------|--------------------------|---------------------------|
| My health is very good            | <input type="checkbox"/>     | <input type="checkbox"/> | <input type="checkbox"/> | <input type="checkbox"/> | <input type="checkbox"/>  |
| I am very worried about my health | <input type="checkbox"/>     | <input type="checkbox"/> | <input type="checkbox"/> | <input type="checkbox"/> | <input type="checkbox"/>  |
| I often think about my health     | <input type="checkbox"/>     | <input type="checkbox"/> | <input type="checkbox"/> | <input type="checkbox"/> | <input type="checkbox"/>  |

**DEMOGRAPHIC QUESTIONS**

**Age**

Year of Birth: \_\_\_\_\_

**Gender**

- Female
- Male
- Other

**Do you work (or have you worked) in healthcare?**

- Yes
- No

**Education? (Select the highest education/degree you have received/completed)**

- No formal education
- Compulsory education   
(e.g., elementary school, junior secondary school)
- High school, less than 3 years
- High school, 3 years or more
- Higher education, less than 3 years
- Higher education, 3 years or more
- Doctorate

Other (specify): \_\_\_\_\_

**I belong to the following county council:**

- Blekinge county council
- Dalarna county council
- Region Gotland
- Region Gävleborg
- Region Halland
- Region Jämtland/Härjedalen
- Region Jönköpings län
- Kalmar county council
- Kronoberg county council
- Norrbottn county council
- Region Skåne
- Stockholm county council
- Sörmland county council
- Region Uppsala
- Värmland county council
- Västerbottens county council
- Västernorrland county council
- Västmanland county council
- Region Västra Götaland
- Region Örebro
- Region Östergötland

**I have also received healthcare in another county council:**

- Blekinge county council
- Dalarna county council
- Region Gotland
- Region Gävleborg
- Region Halland
- Region Jämtland/Härjedalen
- Region Jönköpings län
- Kalmar county council
- Kronoberg county council
- Norrbottn county council
- Region Skåne
- Stockholm county council
- Sörmland county council
- Region Uppsala
- Värmland county council
- Västerbottens county council
- Västernorrland county council
- Västmanland county council
- Region Västra Götaland
- Region Örebro
- Region Östergötland
