# Supplementary material for: Patients’ Experiences of Accessing Their Electronic Health Records: National Patient Survey in Sweden
Source: PubMed Central journal article supplement (PMC6238103; doi:10.2196/jmir.9492), 2018-11-01
Supplement: jmir_v20i11e278_app2.pdf [file jmir_v20i11e278_app2.pdf]

This appendix provides details on the chosen items from survey questions 3, 4, 5 and 17. On pages 1-10, the cell with the highest percentage value in each column has been shaded. On pages 11-13, answers from current and former healthcare professionals and answers from all other respondents are compared in tables. See questionnaire in Multimedia Appendix 1 for the exact formulations.

### Results from question 3 (“I believe that access to medical records online is generally a good reform”) from the respective county council

| County council  | Strongly agree  | Agree          | Neutral      | Disagree     | Strongly disagree |
|-----------------|-----------------|----------------|--------------|--------------|-------------------|
| Skåne           | 570/653 (87.3%) | 66/653 (10.1%) | 6/653 (0.9%) | 7/653 (1.1%) | 4/653 (0.6%)      |
| Uppsala         | 417/491 (84.9%) | 60/491 (12.2%) | 6/491 (1.2%) | 2/491 (0.4%) | 6/491 (1.2%)      |
| Östergötland    | 285/341 (83.6%) | 42/341 (12.3%) | 6/341 (1.8%) | 4/341 (1.2%) | 4/341 (1.2%)      |
| Västra götaland | 250/304 (82.2%) | 36/304 (11.8%) | 8/304 (2.6%) | 8/304 (2.6%) | 2/304 (0.7%)      |
| Stockholm       | 248/291 (85.2%) | 30/291 (10.3%) | 5/291 (1.7%) | 4/291 (1.4%) | 4/291 (1.4%)      |
| Jönköping       | 168/203 (82.8%) | 31/203 (15.3%) | 2/203 (1.0%) | 2/203 (1.0%) | 0/203 (0.0%)      |
| Örebro          | 141/169 (83.4%) | 21/169 (12.4%) | 6/169 (3.6%) | 1/169 (0.6%) | 0/169 (0.0%)      |
| Värmland        | 140/170 (82.4%) | 23/170 (13.5%) | 4/170 (2.4%) | 2/170 (1.2%) | 1/170 (0.6%)      |
| Västmanland     | 130/153 (85.0%) | 18/153 (11.8%) | 3/153 (2.0%) | 0/153 (0.0%) | 2/153 (1.3%)      |
| Dalarna         | 130/153 (85.0%) | 20/153 (13.1%) | 2/153 (1.3%) | 1/153 (0.7%) | 0/153 (0.0%)      |
| Sörmland        | 114/138 (82.6%) | 20/138 (14.5%) | 2/138 (1.4%) | 0/138 (0.0%) | 2/138 (1.4%)      |
| Västerbotten    | 111/139 (80.0%) | 21/139 (15.1%) | 2/139 (1.4%) | 3/139 (2.2%) | 2/139 (2.2%)      |
| Kronoberg       | 110/128 (85.9%) | 13/128 (10.2%) | 2/128 (1.6%) | 2/128 (1.6%) | 1/128 (0.8%)      |
| Kalmar          | 102/128 (79.7%) | 21/128 (16.4%) | 2/128 (1.6%) | 3/128 (2.3%) | 0/128 (0.0%)      |
| Blekinge        | 86/101 (85.1%)  | 10/101 (9.9%)  | 3/101 (3.0%) | 0/101 (0.0%) | 2/101 (2.0%)      |
| Norrbottn       | 79/94 (84.0%)   | 9/94 (9.6%)    | 3/94 (3.2%)  | 1/94 (1.1%)  | 2/94 (2.1%)       |

### Results from question 4 (“Why do you use “Journalen”?”)

| Reason for use               | Strongly agree    | Agree            | Neutral          | Disagree         | Strongly disagree |
|------------------------------|-------------------|------------------|------------------|------------------|-------------------|
| General interest             | 803/2426 (33.1%)  | 751/2426 (31.0%) | 449/2426 (18.5%) | 184/2426 (7.6%)  | 239/2426 (9.9%)   |
| Own overview                 | 1913/2514 (76.1%) | 419/2514 (16.7%) | 99/2514 (3.9%)   | 29/2514 (1.2%)   | 54/2514 (2.1%)    |
| Overview relative            | 336/2390 (14.1%)  | 204/2390 (8.5%)  | 342/2390 (14.3%) | 171/2390 (7.2%)  | 1337/2390 (55.9%) |
| Insecure about care accuracy | 295/2427 (12.2%)  | 437/2427 (18.0%) | 564/2427 (23.2%) | 426/2427 (17.6%) | 705/2427 (29.0%)  |
| Follow-up on visit           | 1551/2512 (61.7%) | 670/2512 (26.7%) | 146/2512 (5.8%)  | 45/2512 (1.8%)   | 100/2512 (4.0%)   |
| Suspect error                | 205/2432 (8.4%)   | 308/2432 (12.7%) | 534/2432 (22.0%) | 485/2432 (19.9%) | 900/2432 (37.0%)  |
| Prepare for visit            | 675/2457 (27.5%)  | 727/2457 (29.6%) | 504/2457 (20.5%) | 221/2457 (9.0%)  | 330/2457 (13.4%)  |
| More involved                | 1372/2470 (55.5%) | 651/2470 (26.4%) | 283/2470 (11.5%) | 57/2470 (2.3%)   | 107/2470 (4.3%)   |

### Results from question 5 (“How important is it for you to be able to access patient information?”)

| Alternative             | Strongly agree       | Agree               | Neutral             | Disagree           | Strongly disagree    |
|-------------------------|----------------------|---------------------|---------------------|--------------------|----------------------|
| Improves communication  | 1418/2525<br>(56.2%) | 705/2525<br>(27.9%) | 280/2525<br>(11.1%) | 67/2525<br>(2.7%)  | 55/2525<br>(2.2%)    |
| Better care             | 1082/2486<br>(43.5%) | 744/2486<br>(29.9%) | 504/2486<br>(20.3%) | 85/2486<br>(3.4%)  | 71/2486<br>(2.9%)    |
| Better understanding    | 1305/2494<br>(52.3%) | 698/2494<br>(28.0%) | 343/2494<br>(13.8%) | 83/2494<br>(3.3%)  | 65/2494<br>(2.6%)    |
| Feel safe               | 1261/2502<br>(50.4%) | 733/2502<br>(29.3%) | 379/2502<br>(15.1%) | 62/2502<br>(2.5%)  | 67/2502<br>(2.7%)    |
| Feel informed           | 1792/2506<br>(71.5%) | 556/2506<br>(22.2%) | 105/2506<br>(4.2%)  | 20/2506<br>(0.8%)  | 33/2506<br>(1.3%)    |
| Better self care        | 589/2477<br>(23.8%)  | 618/2477<br>(24.9%) | 928/2477<br>(37.5%) | 158/2477<br>(6.4%) | 184/2477<br>(7.4%)   |
| Better care of relative | 266/2401<br>(11.1%)  | 231/2401<br>(9.6%)  | 842/2401<br>(35.1%) | 146/2401<br>(6.1%) | 916/2401<br>(38.2%)  |
| Shared decision         | 761/2464<br>(30.9%)  | 531/2464<br>(21.6%) | 625/2464<br>(25.4%) | 122/2464<br>(5.0%) | 425/2464<br>(17.2%)  |
| Own documentation       | 1104/2451<br>(45.0%) | 651/2451<br>(26.6%) | 380/2451<br>(15.5%) | 111/2451<br>(4.5%) | 205/2451<br>(8.4%)   |
| No relevance            | 50/2346<br>(2.1%)    | 47/2346<br>(2.0%)   | 299/2346<br>(12.7%) | 222/2346<br>(9.5%) | 1728/2346<br>(73.7%) |

**Results from question 17 (“How important is it for you to have access the following information which is wholly or partly based on information contained in “Journalen””) from the respective county councils**

**Entire nation**

| Information         | Strongly agree       | Agree               | Neutral             | Disagree          | Strongly disagree  |
|---------------------|----------------------|---------------------|---------------------|-------------------|--------------------|
| Referrals           | 1775/2444<br>(72.6%) | 425/2444<br>(17.4%) | 199/2444<br>(8.1%)  | 18/2444<br>(0.7%) | 29/2444<br>(1.2%)  |
| Med. list           | 1864/2454<br>(76.0%) | 333/2454<br>(13.6%) | 186/2454<br>(7.6%)  | 32/2454<br>(1.3%) | 39/2454<br>(1.6%)  |
| Immunizations       | 1570/2434<br>(64.5%) | 387/2434<br>(15.9%) | 366/2434<br>(15.0%) | 41/2434<br>(1.7%) | 70/2434<br>(2.9%)  |
| Test results        | 2049/2455<br>(83.5%) | 283/2455<br>(11.5%) | 84/2455<br>(3.4%)   | 11/2455<br>(0.4%) | 28/2455<br>(1.1%)  |
| Visit history       | 1802/2437<br>(73.9%) | 407/2437<br>(16.7%) | 172/2437<br>(7.1%)  | 25/2437<br>(1.0%) | 31/2437<br>(1.3%)  |
| Log list            | 1314/2416<br>(54.4%) | 482/2416<br>(20.0%) | 353/2416<br>(14.6%) | 79/2416<br>(3.3%) | 188/2416<br>(7.8%) |
| Health declarations | 1168/2421<br>(48.2%) | 633/2421<br>(26.1%) | 453/2421<br>(18.7%) | 66/2421<br>(2.7%) | 101/2421<br>(4.2%) |
| Notes               | 1920/2453<br>(78.3%) | 314/2453<br>(12.8%) | 141/2453<br>(5.7%)  | 35/2453<br>(1.4%) | 43/2453<br>(1.8%)  |

**Region Skåne**

| Information | Strongly agree     | Agree              | Neutral          | Disagree        | Strongly disagree |
|-------------|--------------------|--------------------|------------------|-----------------|-------------------|
| Referrals   | 486/651<br>(74.7%) | 101/651<br>(15.5%) | 51/651<br>(7.8%) | 6/651<br>(0.9%) | 7/651<br>(1.1%)   |
| Med. list   | 505/649<br>(77.8%) | 77/649<br>(11.9%)  | 51/649<br>(7.9%) | 9/649<br>(1.4%) | 7/649<br>(1.1%)   |

Multimedia Appendix 2: Detailed results

|                     |                    |                    |                    |                  |                  |
|---------------------|--------------------|--------------------|--------------------|------------------|------------------|
| Immunizations       | 435/644<br>(67.5%) | 98/644<br>(15.2%)  | 84/644<br>(13.0%)  | 8/644<br>(1.2%)  | 19/644<br>(3.0%) |
| Test results        | 547/648<br>(84.4%) | 59/648<br>(9.1%)   | 27/648<br>(4.2%)   | 6/648<br>(0.9%)  | 9/648<br>(1.4%)  |
| Visit history       | 506/648<br>(78.1%) | 84/648<br>(13.0%)  | 45/648<br>(6.9%)   | 7/648<br>(1.1%)  | 6/648<br>(0.9%)  |
| Log list            | 356/642<br>(55.5%) | 118/642<br>(18.4%) | 97/642<br>(15.1%)  | 24/642<br>(3.7%) | 47/642<br>(7.3%) |
| Health declarations | 319/646<br>(49.4%) | 155/646<br>(24.0%) | 131/646<br>(20.3%) | 16/646<br>(2.5%) | 25/646<br>(3.9%) |
| Notes               | 537/650<br>(82.6%) | 66/650<br>(10.2%)  | 25/650<br>(3.8%)   | 9/650<br>(1.4%)  | 13/650<br>(2.0%) |

**Region Uppsala**

| <b>Information</b>  | <b>Strongly agree</b> | <b>Agree</b>       | <b>Neutral</b>    | <b>Disagree</b>  | <b>Strongly disagree</b> |
|---------------------|-----------------------|--------------------|-------------------|------------------|--------------------------|
| Referrals           | 352/486<br>(72.4%)    | 99/486<br>(20.4%)  | 29/486<br>(6.0%)  | 3/486<br>(0.6%)  | 3/486<br>(0.6%)          |
| Med. list           | 354/488<br>(72.5%)    | 79/488<br>(16.2%)  | 45/488<br>(9.2%)  | 1/488<br>(0.2%)  | 9/488<br>(1.8%)          |
| Immunizations       | 302/485<br>(62.3%)    | 78/485<br>(16.1%)  | 81/485<br>(16.7%) | 9/485<br>(1.9%)  | 15/485<br>(3.1%)         |
| Test results        | 410/491<br>(83.5%)    | 66/491<br>(13.4%)  | 10/491<br>(2.0%)  | 0/491<br>(0.0%)  | 5/491<br>(1.0%)          |
| Visit history       | 349/484<br>(72.1%)    | 87/484<br>(18.0%)  | 36/484<br>(7.4%)  | 5/484<br>(1.0%)  | 7/484<br>(1.4%)          |
| Log list            | 274/484<br>(56.6%)    | 94/484<br>(19.4%)  | 69/484<br>(14.3%) | 13/484<br>(2.7%) | 34/484<br>(7.0%)         |
| Health declarations | 236/482<br>(49.0%)    | 115/482<br>(23.9%) | 99/482<br>(20.5%) | 16/482<br>(3.3%) | 16/482<br>(3.3%)         |
| Notes               | 383/487<br>(78.6%)    | 65/487<br>(13.3%)  | 31/487<br>(6.4%)  | 4/487<br>(0.8%)  | 4/487<br>(0.8%)          |

**Region Östergötland**

| <b>Information</b>  | <b>Strongly agree</b> | <b>Agree</b>      | <b>Neutral</b>    | <b>Disagree</b>  | <b>Strongly disagree</b> |
|---------------------|-----------------------|-------------------|-------------------|------------------|--------------------------|
| Referrals           | 247/338<br>(73.1%)    | 55/338<br>(16.3%) | 28/338<br>(8.3%)  | 4/338<br>(1.2%)  | 4/338<br>(1.2%)          |
| Med. list           | 253/338<br>(74.9%)    | 54/338<br>(16.0%) | 24/338<br>(7.1%)  | 3/338<br>(0.9%)  | 4/338<br>(1.2%)          |
| Immunizations       | 220/334<br>(65.9%)    | 55/334<br>(16.5%) | 46/334<br>(13.8%) | 8/334<br>(2.4%)  | 5/334<br>(1.5%)          |
| Test results        | 284/338<br>(84.0%)    | 41/338<br>(12.1%) | 8/338<br>(2.4%)   | 2/338<br>(0.6%)  | 3/338<br>(0.9%)          |
| Visit history       | 253/335<br>(75.5%)    | 57/335<br>(17.0%) | 17/335<br>(5.1%)  | 5/335<br>(1.5%)  | 3/335<br>(0.9%)          |
| Log list            | 179/331<br>(54.1%)    | 75/331<br>(22.7%) | 46/331<br>(13.9%) | 11/331<br>(3.3%) | 20/331<br>(6.0%)         |
| Health declarations | 156/330<br>(47.3%)    | 99/330<br>(30.0%) | 54/330<br>(16.4%) | 9/330<br>(2.7%)  | 12/330<br>(3.6%)         |
| Notes               | 253/338<br>(74.9%)    | 54/338<br>(16.0%) | 22/338<br>(6.5%)  | 5/338<br>(1.5%)  | 4/338<br>(1.2%)          |

**Region Västra Götaland**

| <b>Information</b>  | <b>Strongly agree</b> | <b>Agree</b>      | <b>Neutral</b>    | <b>Disagree</b>  | <b>Strongly disagree</b> |
|---------------------|-----------------------|-------------------|-------------------|------------------|--------------------------|
| Referrals           | 229/305<br>(75.1%)    | 51/305<br>(16.7%) | 15/305<br>(4.9%)  | 3/305<br>(1.0%)  | 7/305<br>(2.3%)          |
| Med. list           | 236/307<br>(76.9%)    | 35/307<br>(11.4%) | 26/307<br>(8.5%)  | 4/307<br>(1.3%)  | 6/307<br>(2.0%)          |
| Immunizations       | 197/302<br>(65.2%)    | 54/302<br>(17.9%) | 37/302<br>(12.3%) | 4/302<br>(1.3%)  | 10/302<br>(3.3%)         |
| Test results        | 258/309<br>(83.5%)    | 35/309<br>(11.3%) | 9/309<br>(2.9%)   | 3/309<br>(1.0%)  | 4/309<br>(1.3%)          |
| Visit history       | 224/305<br>(73.4%)    | 47/305<br>(15.4%) | 23/305<br>(7.5%)  | 5/305<br>(1.6%)  | 6/305<br>(2.0%)          |
| Log list            | 151/297<br>(50.8%)    | 61/297<br>(20.5%) | 39/297<br>(13.1%) | 13/297<br>(4.4%) | 33/297<br>(11.1%)        |
| Health declarations | 157/301<br>(52.2%)    | 69/301<br>(22.9%) | 51/301<br>(16.9%) | 12/301<br>(4.0%) | 12/301<br>(4.0%)         |
| Notes               | 236/307<br>(76.9%)    | 38/307<br>(12.4%) | 20/307<br>(6.5%)  | 8/307<br>(2.6%)  | 5/307<br>(1.6%)          |

**Region Jönköping**

| <b>Information</b>  | <b>Strongly agree</b> | <b>Agree</b>      | <b>Neutral</b>    | <b>Disagree</b> | <b>Strongly disagree</b> |
|---------------------|-----------------------|-------------------|-------------------|-----------------|--------------------------|
| Referrals           | 134/200<br>(67.0%)    | 37/200<br>(18.5%) | 23/200<br>(11.5%) | 2/200<br>(1.0%) | 4/200<br>(2.0%)          |
| Med. list           | 152/200<br>(76.0%)    | 27/200<br>(13.5%) | 17/200<br>(8.5%)  | 3/200<br>(1.5%) | 1/200<br>(0.5%)          |
| Immunizations       | 131/200<br>(65.5%)    | 40/200<br>(20.0%) | 21/200<br>(10.5%) | 4/200<br>(2.0%) | 4/200<br>(2.0%)          |
| Test results        | 166/202<br>(82.2%)    | 26/202<br>(12.9%) | 8/202<br>(4.0%)   | 0/202<br>(0.0%) | 2/202<br>(1.0%)          |
| Visit history       | 139/198<br>(70.2%)    | 46/198<br>(23.2%) | 8/198<br>(4.0%)   | 3/198<br>(1.5%) | 2/198<br>(1.0%)          |
| Log list            | 118/198<br>(60.0%)    | 38/198<br>(19.2%) | 21/198<br>(10.6%) | 7/198<br>(3.5%) | 14/198<br>(7.1%)         |
| Health declarations | 101/199<br>(50.8%)    | 58/199<br>(29.1%) | 32/199<br>(16.1%) | 4/199<br>(2.0%) | 4/199<br>(2.0%)          |
| Notes               | 144/200<br>(72.0%)    | 38/200<br>(19.0%) | 12/200<br>(6.0%)  | 0/200<br>(0.0%) | 6/200<br>(3.0%)          |

**Region Örebro**

| <b>Information</b>  | <b>Strongly agree</b> | <b>Agree</b>      | <b>Neutral</b>    | <b>Disagree</b> | <b>Strongly disagree</b> |
|---------------------|-----------------------|-------------------|-------------------|-----------------|--------------------------|
| Referrals           | 111/166<br>(66.9%)    | 29/166<br>(17.5%) | 20/166<br>(12.0%) | 1/166<br>(0.6%) | 5/166<br>(3.0%)          |
| Med. list           | 130/167<br>(77.8%)    | 23/167<br>(13.8%) | 11/167<br>(6.6%)  | 1/167<br>(0.6%) | 2/167<br>(1.2%)          |
| Immunizations       | 97/167<br>(58.1%)     | 31/167<br>(18.6%) | 32/167<br>(19.2%) | 2/167<br>(1.2%) | 5/167<br>(3.0%)          |
| Test results        | 135/169<br>(79.9%)    | 23/169<br>(13.6%) | 9/169<br>(5.3%)   | 0/169<br>(0.0%) | 2/169<br>(1.2%)          |
| Visit history       | 122/166<br>(73.5%)    | 26/166<br>(15.7%) | 13/166<br>(7.8%)  | 0/166<br>(0.0%) | 5/166<br>(3.0%)          |
| Log list            | 93/169<br>(55.0%)     | 30/169<br>(17.8%) | 27/169<br>(16.0%) | 8/169<br>(4.7%) | 11/169<br>(6.5%)         |
| Health declarations | 77/166<br>(46.4%)     | 50/166<br>(30.1%) | 26/166<br>(15.7%) | 5/166<br>(3.0%) | 8/166<br>(4.8%)          |
| Notes               | 132/168<br>(78.6%)    | 20/168<br>(11.9%) | 14/168<br>(8.3%)  | 2/168<br>(1.2%) | 0/168<br>(0.0%)          |

**Värmland county council**

| <b>Information</b>  | <b>Strongly agree</b> | <b>Agree</b>      | <b>Neutral</b>    | <b>Disagree</b> | <b>Strongly disagree</b> |
|---------------------|-----------------------|-------------------|-------------------|-----------------|--------------------------|
| Referrals           | 110/170<br>(64.7%)    | 36/170<br>(21.2%) | 16/170<br>(9.4%)  | 4/170<br>(2.4%) | 4/170<br>(2.4%)          |
| Med. list           | 122/169<br>(72.2%)    | 24/169<br>(14.2%) | 14/169<br>(8.3%)  | 7/169<br>(4.1%) | 2/169<br>(1.2%)          |
| Immunizations       | 97/168<br>(57.7%)     | 31/168<br>(18.5%) | 31/168<br>(18.5%) | 6/168<br>(3.6%) | 3/168<br>(1.8%)          |
| Test results        | 127/170<br>(74.7%)    | 34/170<br>(20.0%) | 6/170<br>(3.5%)   | 1/170<br>(0.6%) | 2/170<br>(1.2%)          |
| Visit history       | 100/169<br>(59.2%)    | 41/169<br>(24.3%) | 19/169<br>(11.2%) | 4/169<br>(2.4%) | 5/169<br>(3.0%)          |
| Log list            | 85/165<br>(51.5%)     | 31/165<br>(18.8%) | 22/167<br>(13.2%) | 7/165<br>(4.2%) | 20/165<br>(12.1%)        |
| Health declarations | 75/167<br>(44.9%)     | 43/167<br>(25.7%) | 37/167<br>(22.2%) | 1/167<br>(0.6%) | 11/167<br>(6.6%)         |
| Notes               | 123/168<br>(73.2%)    | 28/168<br>(16.7%) | 10/168<br>(6.0%)  | 6/168<br>(3.6%) | 1/168<br>(0.6%)          |

**Västmanland county council**

| <b>Information</b>  | <b>Strongly agree</b> | <b>Agree</b>      | <b>Neutral</b>    | <b>Disagree</b> | <b>Strongly disagree</b> |
|---------------------|-----------------------|-------------------|-------------------|-----------------|--------------------------|
| Referrals           | 121/156<br>(77.6%)    | 21/156<br>(13.5%) | 12/156<br>(7.7%)  | 0/156<br>(0.0%) | 2/156<br>(1.3%)          |
| Med. list           | 122/155<br>(78.7%)    | 17/155<br>(11.0%) | 10/155<br>(6.5%)  | 1/155<br>(0.6%) | 5/155<br>(3.2%)          |
| Immunizations       | 100/155<br>(64.5%)    | 11/155<br>(7.1%)  | 31/155<br>(20.0%) | 2/155<br>(1.3%) | 11/155<br>(7.1%)         |
| Test results        | 146/157<br>(93.0%)    | 5/157<br>(3.2%)   | 3/157<br>(1.9%)   | 0/157<br>(0.0%) | 3/157<br>(1.9%)          |
| Visit history       | 125/154<br>(81.2%)    | 16/154<br>(10.4%) | 10/154<br>(6.5%)  | 0/154<br>(0.0%) | 3/154<br>(1.9%)          |
| Log list            | 100/155<br>(64.5%)    | 29/155<br>(18.7%) | 16/155<br>(10.3%) | 2/155<br>(1.3%) | 8/155<br>(5.2%)          |
| Health declarations | 74/154<br>(48.1%)     | 48/154<br>(31.2%) | 23/154<br>(14.9%) | 2/154<br>(1.3%) | 7/154<br>(4.5%)          |
| Notes               | 127/156<br>(81.4%)    | 16/156<br>(10.3%) | 6/156<br>(3.8%)   | 2/156<br>(1.3%) | 5/156<br>(3.2%)          |

**Dalarna county council**

| <b>Information</b>  | <b>Strongly agree</b> | <b>Agree</b>      | <b>Neutral</b>    | <b>Disagree</b> | <b>Strongly disagree</b> |
|---------------------|-----------------------|-------------------|-------------------|-----------------|--------------------------|
| Referrals           | 108/152<br>(71.1%)    | 24/152<br>(15.8%) | 18/152<br>(11.8%) | 1/152<br>(0.7%) | 1/152<br>(0.7%)          |
| Med. list           | 104/152<br>(68.4%)    | 27/152<br>(17.8%) | 18/152<br>(11.8%) | 2/152<br>(1.3%) | 1/152<br>(0.7%)          |
| Immunizations       | 85/151<br>(56.3%)     | 28/151<br>(18.5%) | 26/151<br>(17.2%) | 5/151<br>(3.3%) | 7/151<br>(4.6%)          |
| Test results        | 120/151<br>(79.5%)    | 22/151<br>(14.6%) | 6/151<br>(4.0%)   | 0/151<br>(0.0%) | 3/151<br>(2.0%)          |
| Visit history       | 118/152<br>(77.6%)    | 21/152<br>(13.8%) | 9/152<br>(5.9%)   | 2/152<br>(1.3%) | 2/152<br>(1.3%)          |
| Log list            | 80/151<br>(53.0%)     | 28/151<br>(18.5%) | 22/151<br>(14.6%) | 7/151<br>(4.6%) | 14/151<br>(9.3%)         |
| Health declarations | 77/152<br>(50.7%)     | 43/152<br>(28.3%) | 19/152<br>(12.5%) | 4/152<br>(2.6%) | 9/152<br>(5.9%)          |
| Notes               | 125/152<br>(82.2%)    | 14/152<br>(9.2%)  | 8/152<br>(5.3%)   | 2/152<br>(1.3%) | 3/152<br>(2.0%)          |

**Sörmland county council**

| <b>Information</b>  | <b>Strongly agree</b> | <b>Agree</b>      | <b>Neutral</b>    | <b>Disagree</b> | <b>Strongly disagree</b> |
|---------------------|-----------------------|-------------------|-------------------|-----------------|--------------------------|
| Referrals           | 98/136<br>(72.1%)     | 23/136<br>(16.9%) | 14/136<br>(10.3%) | 0/136<br>(0.0%) | 3/136<br>(2.2%)          |
| Med. list           | 107/136<br>(78.7%)    | 14/136<br>(10.3%) | 12/136<br>(8.8%)  | 0/136<br>(0.0%) | 3/136<br>(2.2%)          |
| Immunizations       | 85/135<br>(63.0%)     | 12/135<br>(8.9%)  | 33/135<br>(24.4%) | 0/135<br>(0.0%) | 5/135<br>(3.7%)          |
| Test results        | 114/135<br>(84.4%)    | 12/135<br>(8.9%)  | 7/135<br>(5.2%)   | 0/135<br>(0.0%) | 2/135<br>(1.5%)          |
| Visit history       | 101/135<br>(74.8%)    | 18/135<br>(13.3%) | 11/135<br>(8.1%)  | 1/135<br>(0.7%) | 4/135<br>(3.0%)          |
| Log list            | 66/135<br>(48.9%)     | 35/135<br>(25.9%) | 18/135<br>(13.3%) | 4/135<br>(3.0%) | 12/135<br>(8.9%)         |
| Health declarations | 64/133<br>(48.1%)     | 35/133<br>(26.3%) | 24/133<br>(18.0%) | 5/133<br>(3.8%) | 5/133<br>(3.8%)          |
| Notes               | 111/137<br>(81.0%)    | 16/137<br>(11.7%) | 6/137<br>(4.4%)   | 1/137<br>(0.7%) | 3/137<br>(2.2%)          |

**Västerbotten county council**

| <b>Information</b>  | <b>Strongly agree</b> | <b>Agree</b>      | <b>Neutral</b>    | <b>Disagree</b> | <b>Strongly disagree</b> |
|---------------------|-----------------------|-------------------|-------------------|-----------------|--------------------------|
| Referrals           | 90/136<br>(66.2%)     | 26/136<br>(19.1%) | 19/136<br>(14.0%) | 1/136<br>(0.7%) | 0/136<br>(0.0%)          |
| Med. list           | 106/135<br>(78.5%)    | 17/135<br>(12.6%) | 11/135<br>(8.1%)  | 0/135<br>(0.0%) | 1/135<br>(0.7%)          |
| Immunizations       | 94/135<br>(69.6%)     | 21/135<br>(15.6%) | 19/135<br>(14.1%) | 1/135<br>(0.7%) | 1/135<br>(0.0%)          |
| Test results        | 107/135<br>(79.3%)    | 19/135<br>(14.1%) | 8/135<br>(5.9%)   | 1/135<br>(0.7%) | 0/135<br>(0.0%)          |
| Visit history       | 99/136<br>(72.8%)     | 24/136<br>(17.6%) | 11/136<br>(8.1%)  | 2/136<br>(1.5%) | 0/136<br>(0.0%)          |
| Log list            | 69/135<br>(51.1%)     | 25/135<br>(18.5%) | 26/135<br>(19.3%) | 7/135<br>(5.2%) | 8/135<br>(5.9%)          |
| Health declarations | 66/135<br>(48.9%)     | 41/135<br>(30.4%) | 21/135<br>(15.6%) | 2/135<br>(1.5%) | 5/135<br>(3.7%)          |
| Notes               | 98/137<br>(71.5%)     | 17/137<br>(12.4%) | 15/137<br>(10.9%) | 5/137<br>(3.6%) | 2/137<br>(1.5%)          |

**Kronoberg county council**

| <b>Information</b>  | <b>Strongly agree</b> | <b>Agree</b>      | <b>Neutral</b>    | <b>Disagree</b> | <b>Strongly disagree</b> |
|---------------------|-----------------------|-------------------|-------------------|-----------------|--------------------------|
| Referrals           | 91/125<br>(72.8%)     | 20/125<br>(16.0%) | 13/125<br>(10.4%) | 1/125<br>(0.8%) | 0/125<br>(0.0%)          |
| Med. list           | 98/123<br>(79.7%)     | 13/123<br>(10.6%) | 12/123<br>(9.8%)  | 0/123<br>(0.0%) | 0/123<br>(0.0%)          |
| Immunizations       | 86/125<br>(68.8%)     | 15/125<br>(12.0%) | 19/125<br>(15.2%) | 2/125<br>(1.6%) | 3/125<br>(2.4%)          |
| Test results        | 105/126<br>(83.3%)    | 14/126<br>(11.1%) | 6/126<br>(4.8%)   | 0/126<br>(0.0%) | 1/126<br>(0.8%)          |
| Visit history       | 89/125<br>(71.2%)     | 27/125<br>(21.6%) | 9/125<br>(7.2%)   | 0/125<br>(0.0%) | 0/125<br>(0.0%)          |
| Log list            | 71/127<br>(55.9%)     | 23/127<br>(18.1%) | 18/127<br>(14.2%) | 2/127<br>(1.6%) | 13/127<br>(10.2%)        |
| Health declarations | 65/125<br>(52.0%)     | 33/125<br>(26.4%) | 20/125<br>(16.0%) | 2/125<br>(1.6%) | 5/125<br>(4.0%)          |
| Notes               | 96/126<br>(76.2%)     | 16/126<br>(12.7%) | 12/126<br>(9.5%)  | 1/126<br>(0.8%) | 1/126<br>(0.8%)          |

**Kalmar county council**

| <b>Information</b>  | <b>Strongly agree</b> | <b>Agree</b>      | <b>Neutral</b>    | <b>Disagree</b> | <b>Strongly disagree</b> |
|---------------------|-----------------------|-------------------|-------------------|-----------------|--------------------------|
| Referrals           | 93/125<br>(74.4%)     | 20/125<br>(16.0%) | 10/125<br>(8.0%)  | 0/125<br>(0.0%) | 2/125<br>(1.6%)          |
| Med. list           | 102/127<br>(80.3%)    | 15/127<br>(11.8%) | 6/127<br>(4.7%)   | 3/127<br>(2.4%) | 1/127<br>(0.8%)          |
| Immunizations       | 88/124<br>(71.0%)     | 12/124<br>(9.7%)  | 18/124<br>(14.5%) | 2/124<br>(1.6%) | 4/124<br>(3.2%)          |
| Test results        | 106/126<br>(84.1%)    | 13/126<br>(10.3%) | 6/126<br>(4.8%)   | 0/126<br>(0.0%) | 1/126<br>(0.8%)          |
| Visit history       | 100/127<br>(78.7%)    | 19/127<br>(15.0%) | 5/127<br>(3.9%)   | 1/127<br>(0.8%) | 2/127<br>(1.6%)          |
| Log list            | 70/123<br>(56.9%)     | 31/123<br>(25.2%) | 13/123<br>(10.6%) | 1/123<br>(0.8%) | 8/123<br>(6.5%)          |
| Health declarations | 69/122<br>(56.6%)     | 29/122<br>(23.8%) | 15/122<br>(12.3%) | 1/122<br>(0.8%) | 8/122<br>(6.6%)          |
| Notes               | 95/126<br>(75.4%)     | 21/126<br>(16.7%) | 6/126<br>(4.8%)   | 2/126<br>(1.6%) | 2/126<br>(1.6%)          |

**Region Halland**

| <b>Information</b>  | <b>Strongly agree</b> | <b>Agree</b>      | <b>Neutral</b>    | <b>Disagree</b> | <b>Strongly disagree</b> |
|---------------------|-----------------------|-------------------|-------------------|-----------------|--------------------------|
| Referrals           | 73/100<br>(73.0%)     | 14/100<br>(14.0%) | 9/100<br>(9.0%)   | 0/100<br>(0.0%) | 4/100<br>(4.0%)          |
| Med. list           | 83/101<br>(82.2%)     | 9/101<br>(8.9%)   | 6/101<br>(5.9%)   | 1/101<br>(1.0%) | 2/101<br>(2.0%)          |
| Immunizations       | 68/100<br>(68.0%)     | 12/100<br>(12.0%) | 14/100<br>(14.0%) | 2/100<br>(2.0%) | 4/100<br>(4.0%)          |
| Test results        | 83/101<br>(82.2%)     | 9/101<br>(8.9%)   | 4/101<br>(4.0%)   | 2/101<br>(2.0%) | 3/101<br>(3.0%)          |
| Visit history       | 75/99<br>(75.8%)      | 13/99<br>(13.1%)  | 6/99<br>(6.1%)    | 2/99<br>(2.0%)  | 3/99<br>(5.1%)           |
| Log list            | 54/99<br>(54.5%)      | 20/99<br>(20.2%)  | 14/99<br>(14.1%)  | 3/99<br>(5.1%)  | 8/99<br>(8.1%)           |
| Health declarations | 55/99<br>(55.6%)      | 20/99<br>(20.2%)  | 15/99<br>(15.2%)  | 4/99<br>(4.0%)  | 5/99<br>(5.1%)           |
| Notes               | 77/102<br>(75.5%)     | 13/102<br>(12.7%) | 4/102<br>(3.9%)   | 6/102<br>(5.9%) | 2/102<br>(2.0%)          |

**Blekinge county council**

| <b>Information</b>  | <b>Strongly agree</b> | <b>Agree</b>     | <b>Neutral</b>   | <b>Disagree</b> | <b>Strongly disagree</b> |
|---------------------|-----------------------|------------------|------------------|-----------------|--------------------------|
| Referrals           | 64/92<br>(69.6%)      | 16/92<br>(17.4%) | 10/92<br>(10.9%) | 0/92<br>(0.0%)  | 2/92<br>(2.2%)           |
| Med. list           | 68/91<br>(74.7%)      | 13/91<br>(14.3%) | 7/91<br>(7.7%)   | 2/91<br>(2.2%)  | 1/91<br>(1.1%)           |
| Immunizations       | 60/90<br>(66.7%)      | 16/90<br>(17.8%) | 11/90<br>(12.2%) | 1/90<br>(1.1%)  | 2/90<br>(2.2%)           |
| Test results        | 73/90<br>(81.1%)      | 11/90<br>(12.2%) | 5/90<br>(5.6%)   | 1/90<br>(1.1%)  | 0/90<br>(0.0%)           |
| Visit history       | 67/92<br>(72.8%)      | 19/92<br>(20.7%) | 6/92<br>(6.5%)   | 0/92<br>(0.0%)  | 0/92<br>(0.0%)           |
| Log list            | 49/89<br>(55.1%)      | 22/89<br>(24.7%) | 14/89<br>(15.7%) | 0/89<br>(0.0%)  | 4/89<br>(4.5%)           |
| Health declarations | 52/91<br>(57.1%)      | 24/91<br>(26.4%) | 7/91<br>(7.7%)   | 3/91<br>(3.3%)  | 4/91<br>(4.4%)           |
| Notes               | 68/90<br>(75.6%)      | 12/90<br>(13.3%) | 6/90<br>(6.7%)   | 2/90<br>(2.2%)  | 2/90<br>(2.2%)           |

**Norrbottnen county council**

| <b>Information</b>  | <b>Strongly agree</b> | <b>Agree</b>     | <b>Neutral</b>   | <b>Disagree</b> | <b>Strongly disagree</b> |
|---------------------|-----------------------|------------------|------------------|-----------------|--------------------------|
| Referrals           | 68/92<br>(73.9%)      | 16/92<br>(17.4%) | 5/92<br>(5.4%)   | 2/92<br>(2.2%)  | 1/92<br>(1.1%)           |
| Med. list           | 69/93<br>(74.2%)      | 10/93<br>(10.8%) | 7/93<br>(7.5%)   | 5/93<br>(5.4%)  | 2/93<br>(2.2%)           |
| Immunizations       | 56/92<br>(60.9%)      | 17/92<br>(18.5%) | 15/92<br>(16.3%) | 3/92<br>(3.3%)  | 1/92<br>(1.1%)           |
| Test results        | 78/92<br>(84.8%)      | 8/92<br>(8.7%)   | 5/92<br>(5.4%)   | 0/92<br>(0.0%)  | 1/92<br>(1.1%)           |
| Visit history       | 62/91<br>(68.1%)      | 22/91<br>(24.2%) | 5/91<br>(5.5%)   | 1/91<br>(1.1%)  | 1/91<br>(1.1%)           |
| Log list            | 54/92<br>(58.7%)      | 15/92<br>(16.3%) | 14/92<br>(15.2%) | 3/92<br>(3.3%)  | 6/92<br>(6.5%)           |
| Health declarations | 45/93<br>(48.4%)      | 18/93<br>(19.4%) | 18/93<br>(19.4%) | 5/93<br>(5.4%)  | 7/93<br>(7.5%)           |
| Notes               | 63/93<br>(67.7%)      | 17/93<br>(18.3%) | 10/93<br>(10.8%) | 1/93<br>(1.1%)  | 2/93<br>(2.2%)           |

**Comparisons between answers from current and former healthcare professionals and answers from all other respondents (the translation 1=Strongly disagree, 5=Strongly agree has been used in all calculations)**

Q3: What is your attitude towards “*Journalen*”?

- a. I believe that access to medical records online is generally a good reform
- b. I believe that access to "Journalen" is good for me

| Question         | N    | Mean | St. dev. | p-value (95%) |
|------------------|------|------|----------|---------------|
| 3a-professionals | 1018 | 4.70 | 0.699    | P<0.001       |
| 3a-others        | 1395 | 4.85 | 0.515    |               |
| 3b-professionals | 1015 | 4.82 | 0.560    | P=0.005       |
| 3b-others        | 1385 | 4.87 | 0.496    |               |

Q4: Why do you use “*Journalen*”?

- a. Mostly general interest
- b. To get an overview of my medical history and treatment
- c. To get an overview of my relatives’ medical history and treatment
- d. Because I am not sure if I got the right care
- e. To follow up what has been said during a health care visit
- f. Because I suspect inaccuracies
- g. To prepare for my health care visit
- h. To become more involved in my care

| Question         | N    | Mean | St. dev. | p-value (95%) |
|------------------|------|------|----------|---------------|
| 4a-professionals | 990  | 3.74 | 1.257    | P=0.199       |
| 4a-others        | 1316 | 3.68 | 1.275    |               |
| 4b-professionals | 1013 | 4.59 | 0.854    | P=0.128       |
| 4b-others        | 1379 | 4.65 | 0.764    |               |
| 4c-professionals | 974  | 2.20 | 1.534    | P=0.976       |
| 4c-others        | 1301 | 2.18 | 1.497    |               |
| 4d-professionals | 985  | 2.54 | 1.356    | P=0.001       |
| 4d-others        | 1323 | 2.74 | 1.384    |               |
| 4e-professionals | 1013 | 4.39 | 0.992    | P=0.829       |
| 4e-others        | 1375 | 4.41 | 0.955    |               |
| 4f-professionals | 983  | 2.32 | 1.313    | P=0.497       |
| 4f-others        | 1329 | 2.35 | 1.300    |               |
| 4g-professionals | 987  | 3.38 | 1.391    | P=0.003       |
| 4g-others        | 1354 | 3.57 | 1.295    |               |
| 4h-professionals | 1004 | 4.28 | 1.058    | P=0.161       |
| 4h-others        | 1347 | 4.25 | 1.029    |               |

## Q5: How important is it for you to be able to access patient information?

- a. It improves communication between medical staff and me
- b. It leads to improvements in health and social care
- c. It improves the understanding of the condition
- d. It makes me feel safe
- e. It makes me feel informed
- f. It leads to that I can take care of my health better
- g. It leads to that I can take care of my relatives health better
- h. It is essential that I am able to actively participate in decisions about my or my relatives' health
- i. For my own documentation
- j. It has no relevance

| Question         | N    | Mean | St. dev. | p-value (95%) |
|------------------|------|------|----------|---------------|
| 5a-professionals | 1015 | 4.24 | 1.003    | P<0.001       |
| 5a-others        | 1391 | 4.41 | 0.849    |               |
| 5b-professionals | 1005 | 4.01 | 1.071    | P=0.013       |
| 5b-others        | 1366 | 4.14 | 0.952    |               |
| 5c-professionals | 1001 | 4.14 | 1.057    | P<0.001       |
| 5c-others        | 1374 | 4.33 | 0.899    |               |
| 5d-professionals | 1009 | 4.22 | 0.985    | P=0.852       |
| 5d-others        | 1373 | 4.24 | 0.944    |               |
| 5e-professionals | 1010 | 4.57 | 0.799    | P=0.021       |
| 5e-others        | 1376 | 4.67 | 0.621    |               |
| 5f-professionals | 1001 | 3.42 | 1.179    | P<0.001       |
| 5f-others        | 1356 | 3.60 | 1.095    |               |
| 5g-professionals | 970  | 2.51 | 1.393    | P=0.913       |
| 5g-others        | 1320 | 2.49 | 1.348    |               |
| 5h-professionals | 997  | 3.40 | 1.444    | P=0.377       |
| 5h-others        | 1348 | 3.47 | 1.388    |               |
| 5i-professionals | 994  | 3.77 | 1.321    | P<0.001       |
| 5i-others        | 1346 | 4.09 | 1.158    |               |
| 5j-professionals | 951  | 1.54 | 0.958    | P=0.021       |
| 5j-others        | 1287 | 1.46 | 0.915    |               |

Q17: How important is it for you to have access the following information which is wholly or partly based on information contained in “*Journalen*”

- a. Referral (content and how it is handled in care)
- b. List of all pharmaceuticals
- c. Overview of all vaccinations
- d. Results of tests
- e. Overview of all health care contacts
- f. Being able to read all types of record entries
- g. Contribute with information on health, for example by providing health declaration for next visit
- h. See which care units and staff groups have been inside “*Journalen*” (see log data)

| Question          | N    | Mean | St. dev. | p-value (95%) |
|-------------------|------|------|----------|---------------|
| 17a-professionals | 1018 | 4.59 | 0.776    | P=0.914       |
| 17a-others        | 1375 | 4.59 | 0.771    |               |
| 17b-professionals | 1015 | 4.62 | 0.822    | P=0.368       |
| 17b-others        | 1384 | 4.60 | 0.803    |               |
| 17c-professionals | 1010 | 4.44 | 0.987    | P<0.001       |
| 17c-others        | 1371 | 4.33 | 0.987    |               |
| 17d-professionals | 1020 | 4.77 | 0.623    | P=0.612       |
| 17d-others        | 1383 | 4.75 | 0.654    |               |
| 17e-professionals | 1017 | 4.60 | 0.792    | P=0.701       |
| 17e-others        | 1366 | 4.62 | 0.752    |               |
| 17f-professionals | 1022 | 4.62 | 0.885    | P=0.547       |
| 17f-others        | 1377 | 4.66 | 0.729    |               |
| 17g-professionals | 1014 | 4.22 | 1.051    | P<0.001       |
| 17g-others        | 1354 | 4.05 | 1.075    |               |
| 17h-professionals | 1008 | 4.16 | 1.226    | P=0.004       |
| 17h-others        | 1355 | 4.05 | 1.231    |               |
